# Supplementary material
Source: HighWire-hosted journal article supplement (https://bjsm.bmj.com/content/54/12/711)

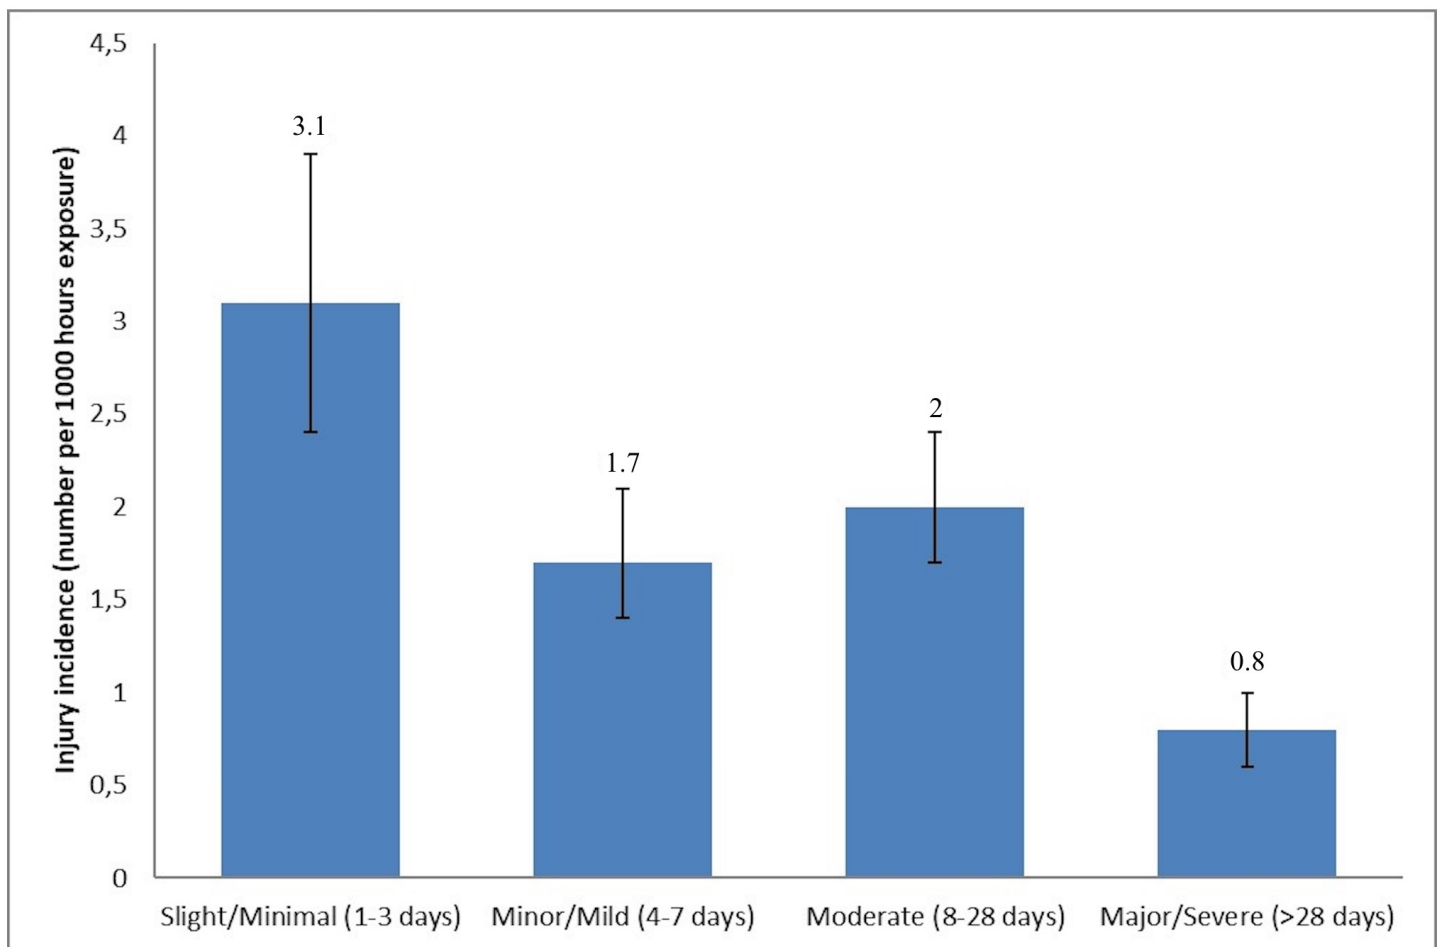

Supplement: inline-supplementary-material-8 [file inline-supplementary-material-8.pdf]
